# Supplementary material for: A sandwich-structured intelligent anti-icing/de-icing film with ice-oriented power self-regulating performance
Source: Royal Society of Chemistry journal article supplement (doi:10.1039/d2tc01717b), 2022-01-01
Supplement: d2tc01717b1.pdf [file d2tc01717b1.pdf]

## Supplementary materials

### Sandwich-structured intelligent anti-icing/de-icing film with ice-oriented power self-regulating performance

Xiaolin Liu, Yantong Zhu, Zelinlan Wang, Zheng Ma, Zehui Zhao, Deyuan Zhang  
and Huawei Chen\*

*Institute of Bionic and Micro-Nano Systems, School of Mechanical Engineering and  
Automation, Beihang University, Beijing 100191, China*

\*Corresponding author: Huawei Chen ([Chenhw75@buaa.edu.cn](mailto:Chenhw75@buaa.edu.cn))

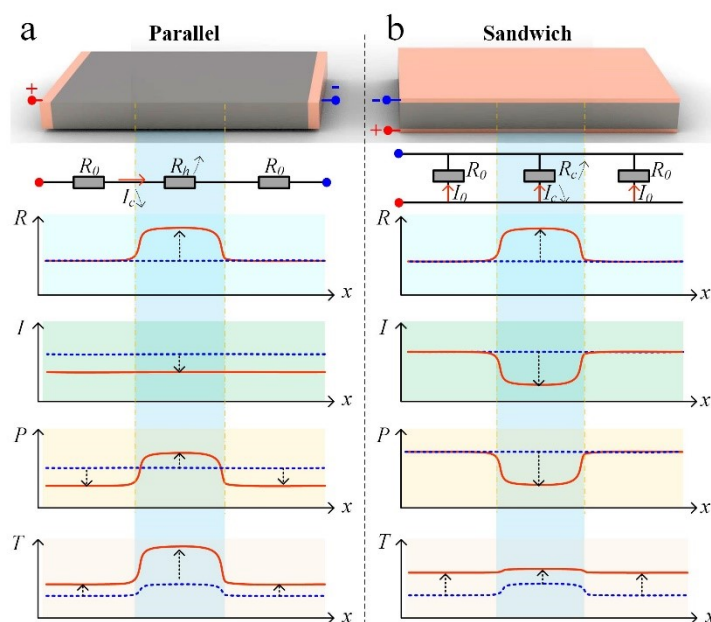

**Figure S1.** A nonsynchronous temperature rise at first will lead to a wider divergent difference on parallel PTC.

Actually, the line-like uneven heating performance is an inherent defect of parallel-structured PTC coating, where the micro-scale elements of coating are serial linked in the normal direction of electrodes; when the coating starts heating, a nonsynchronous temperature rise at first will lead to a wider divergent difference: considering a coating element performs resistance rise earlier than other elements, the distributive proportion of power output on this element will further increase due to the serial link, finally causing a divergent heat distribution. This can only be avoided on an absolutely uniform coating and uniform cold load, which is impractical in engineering.

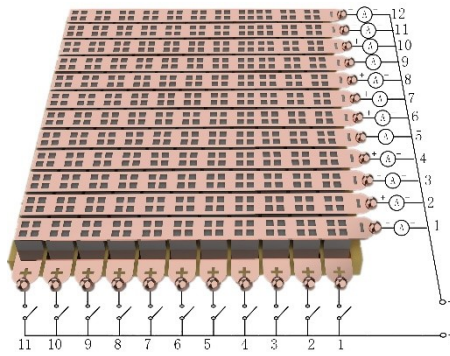

**Figure S2.** The currents scanning acquisition system for PS-PTC consisted of a 12-channel current data acquisition card ( $500 \text{ mA} * 12$ ) with an 11-channel switch module, and could scan  $12*11$  channels of currents at a rate of 300ms per channel, presenting the current variations of all 132 elements of PS-PTC film P10.

**Video S1.** A real-time cold load recognition system based on PS-PTC film sample P10.
